# Supplementary material for: Agar-reduced graphene oxide selectively adsorbs organic dyes and strengthens double-network hydrogels
Source: Royal Society of Chemistry journal article supplement (doi:10.1039/d0ra05735e), 2020-01-01
Supplement: d0ra05735e1.pdf [file d0ra05735e1.pdf]

**Supporting Information**

**Agar-Reduced Graphene Oxide Selectively Adsorbs Organic Dyes and  
Strengthens Double-Network Hydrogels**

Tang Tang,<sup>a</sup> Karel Goossens,<sup>a,d</sup> Sherilyn J. Lu,<sup>a,b</sup> Dongli Meng<sup>a</sup>  
and Christopher W. Bielawski<sup>\*a,b,c</sup>

<sup>a</sup> Center for Multidimensional Carbon Materials (CMCM), Institute for Basic Science (IBS),  
Ulsan 44919 (Republic of Korea)

<sup>b</sup> Department of Chemistry, Ulsan National Institute of Science and Technology (UNIST),  
Ulsan 44919 (Republic of Korea)

<sup>c</sup> Department of Energy Engineering, Ulsan National Institute of Science and Technology  
(UNIST), Ulsan 44919 (Republic of Korea)

<sup>d</sup> Current address: Johnson & Johnson, Janssen R&D, Turnhoutseweg 30, B-2340 Beer  
se, Belgium.

\* Correspondence: bielawski@unist.ac.kr; Tel.: +82-52-217-2952.

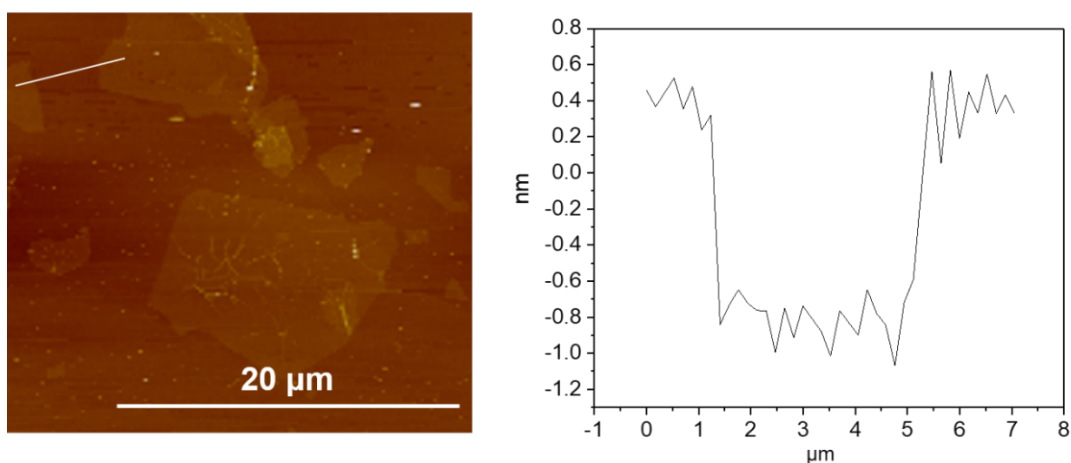

**Figure S1.** AFM image and profile data recorded for graphene oxide.

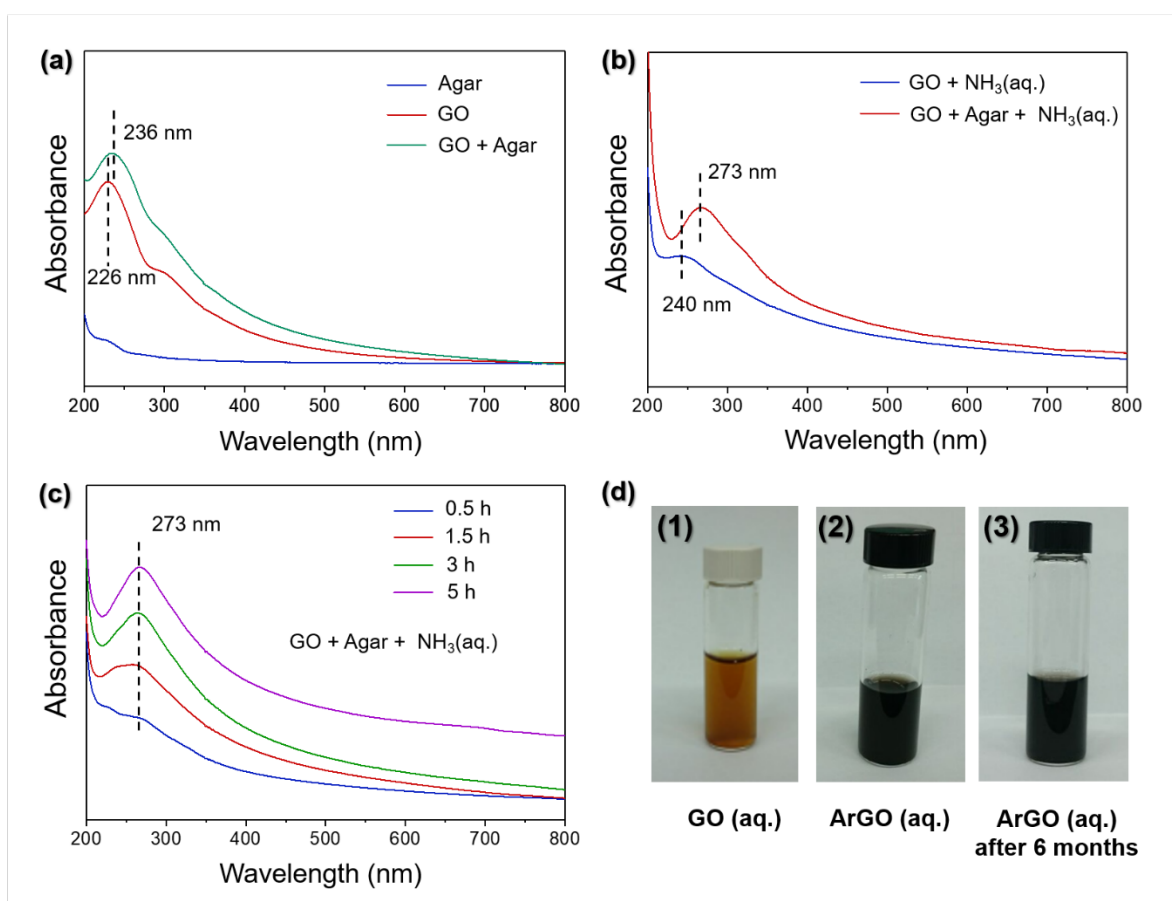

**Figure S2.** (a) UV-vis absorption spectra that were recorded for a  $2.0 \text{ mg mL}^{-1}$  aqueous dispersion of agar after being heated to  $95 \text{ }^\circ\text{C}$  for 12 h (blue); a  $0.2 \text{ mg mL}^{-1}$  aqueous dispersion of GO (red); a  $0.2 \text{ mg mL}^{-1}$  aqueous dispersion of GO with agar (agar/GO = 10 : 1 w/w) after being heated to  $95 \text{ }^\circ\text{C}$  for 12 h (green). (b) UV-vis absorption spectra that were recorded for a  $0.2 \text{ mg mL}^{-1}$  aqueous dispersion of GO and  $\text{NH}_3$  (aq.) (pH = 8 – 9) after being heated to  $95 \text{ }^\circ\text{C}$  for 3 h (blue); a  $0.2 \text{ mg mL}^{-1}$  aqueous dispersion of GO, agar (agar/GO = 10 :

1 w/w) and  $\text{NH}_3$  (aq.) (pH = 8 – 9) after being heated to 95 °C for 3 h (red). (c) UV–vis absorption spectra that were recorded over time (indicated) for a 0.2 mg mL<sup>-1</sup> aqueous dispersion of GO, agar (agar/GO = 10 : 1 w/w) and  $\text{NH}_3$  (aq.) (pH = 8 – 9) that was kept at 95 °C. (d) Photographs of various suspensions and dispersions (indicated).

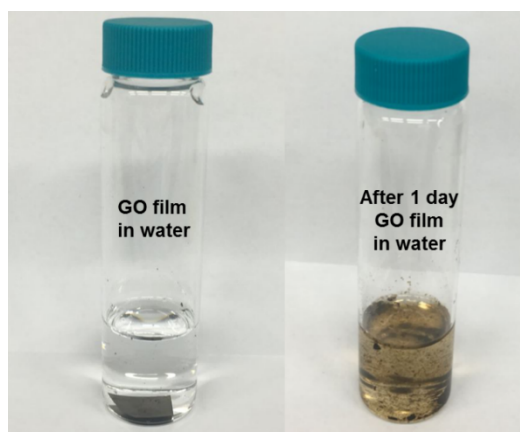

**Figure S3.** Photographs taken (left) after a film of GO was placed in water and (right) after the mixture was left standing for 1 day.

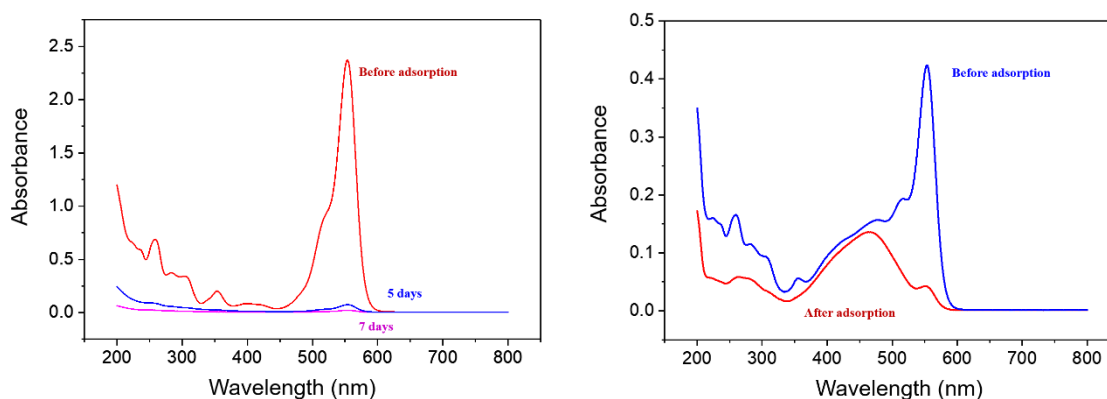

**Figure S4.** UV-vis spectra. (left) The selective adsorption of RhoB versus MO was demonstrated by soaking ArGO paper (1 mg) in an aqueous mixture of both dyes for 12 h ( $[\text{RhoB}]_0 = [\text{MO}]_0 = 1 \text{ mg L}^{-1}$ , 2 mL total volume). (right) The adsorption capacity was assessed by soaking ArGO paper (1 mg) in an aqueous solution of RhoB for 7 days ( $[\text{RhoB}]_0 = 20 \text{ mg L}^{-1}$ , 2 mL total volume).

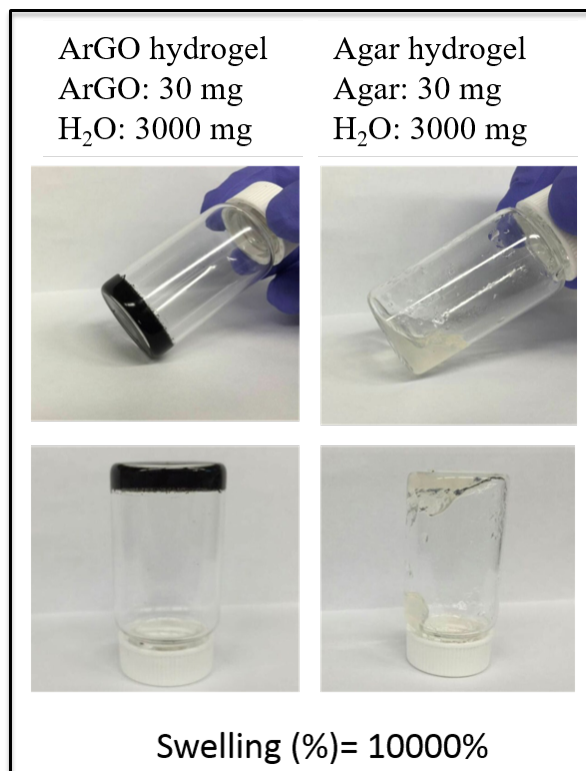

**Figure S5.** Swelling properties of an ArGO hydrogel and an agar hydrogel (indicated).

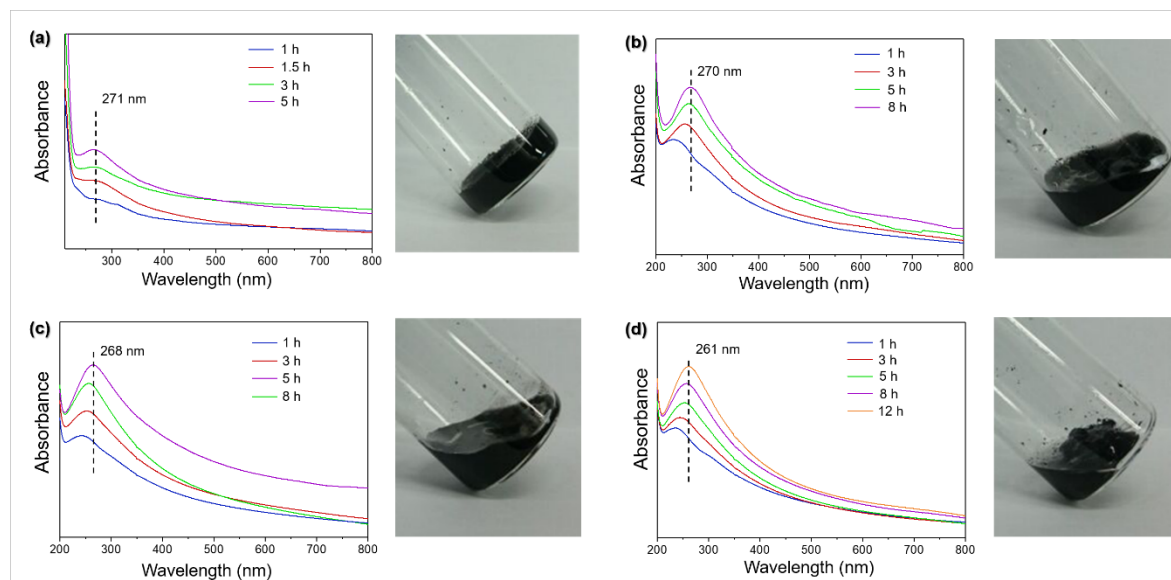

**Figure S6.** UV-vis absorption spectra that were recorded over time and photographs that were recorded over the sol-gel transition. Conditions: 1.0 mg mL<sup>-1</sup> aqueous dispersion of GO + NH<sub>3</sub> (aq.) (pH=8-9, mixed with (a) agar (agar/GO = 10 : 1 w/w), (b) agar (agar/GO = 5 : 1 w/w), (c) agar (agar/GO = 2 : 1 w/w) and (d) agar (agar/GO = 1 : 1 w/w). Each mixture was heated to 95 °C for the period indicated in the figure legends. Inset: photographs of the ArGO hydrogels that resulted from the reactions.

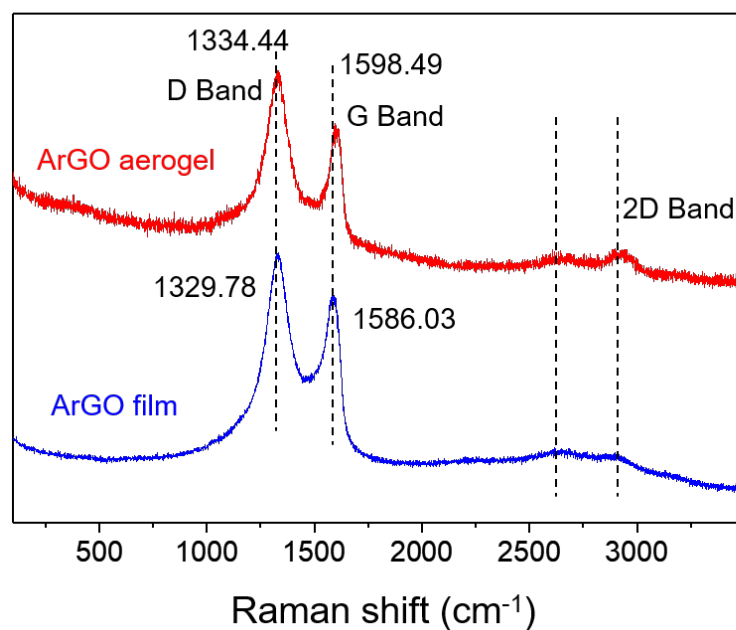

**Figure S7.** Raman spectra recorded for an ArGO film and an ArGO aerogel (indicated). Conditions: ArGO film,  $0.2 \text{ mg mL}^{-1}$  aqueous dispersion GO + agar (agar/GO = 10:1 w/w) +  $\text{NH}_3$  (aq.) (pH = 8-9),  $95 \text{ }^\circ\text{C}$  for 3 h; ArGO gel,  $1.0 \text{ mg mL}^{-1}$  aqueous dispersion GO + agar (agar/GO = 10:1 w/w) +  $\text{NH}_3$  (aq.) (pH = 8-9),  $95 \text{ }^\circ\text{C}$  for 3 h.

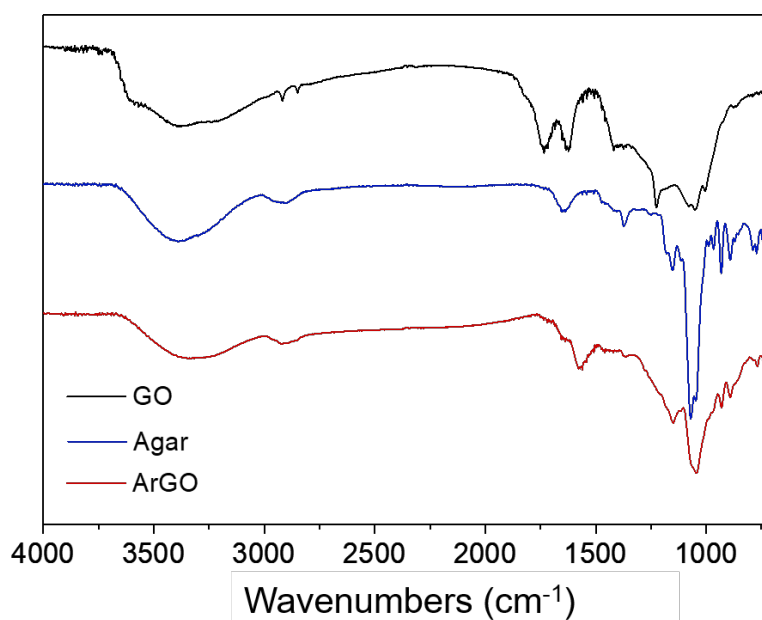

**Figure S8.** FT-IR spectra recorded for GO, agar and ArGO (indicated). Conditions:  $1.0 \text{ mg mL}^{-1}$  aqueous dispersion GO + agar (agar/GO = 10:1 w/w) +  $\text{NH}_3$  (aq.) (pH = 8-9),  $95 \text{ }^\circ\text{C}$  for 3 h.

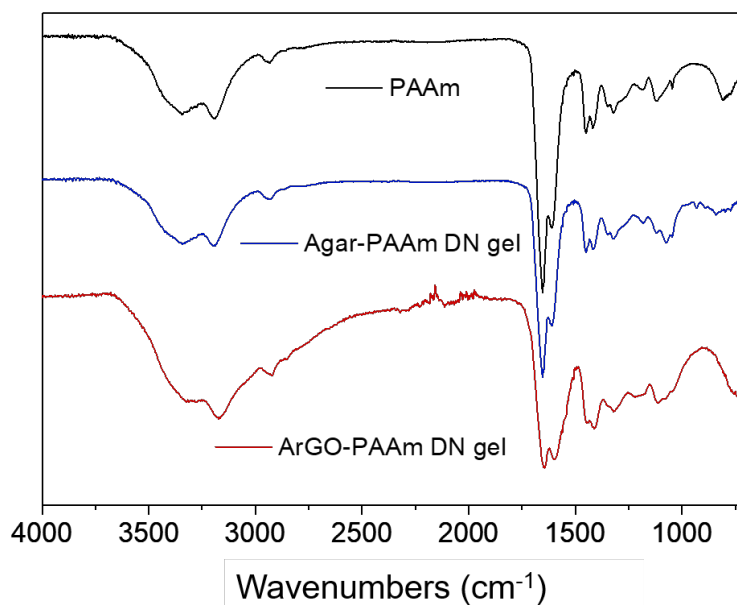

**Figure S9.** FT-IR spectra recorded for PAAm, Agar-PPAm DN gel and ArGO-PAAm DN aerogel (indicated). The gels were freeze-dried for 2 days and then analyzed. Conditions: PAAm, 0.1 mol% MBAA relative to AAm and 1 mol% APS relative to AAm, polymerization time: 7 h at 65 °C; Agar-PAAm DN hydrogel, Agar/AAm = 1: 9 w/w, 0.1 mol% MBAA relative to AAm and 1 mol% APS relative to AAm, polymerization time: 7 h at 65 °C; ArGO-PAAm DN hydrogel, ArGO/AAm = 1: 9 w/w; 0.1 mol% MBAA relative to AAm and 1 mol% APS relative to AAm, polymerization time: 7 h at 65 °C.

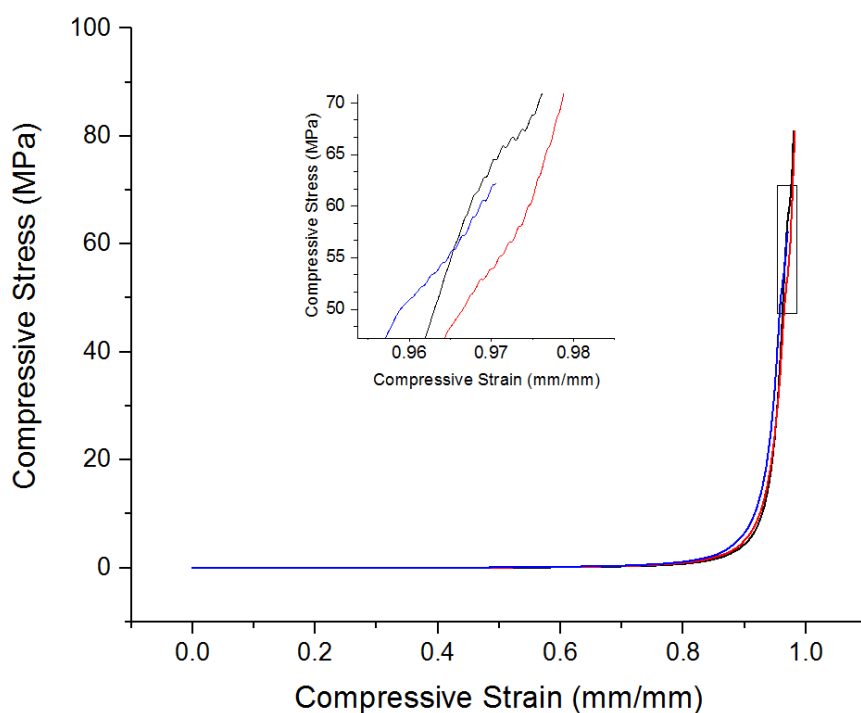

**Figure S10.** Stress–strain curves that were recorded for an ArGO-PAAm DN hydrogel. Conditions: ArGO/AAm = 1 : 9 w/w; 0.1 mol% MBAA relative to AAm and 1 mol% APS relative to AAm; polymerization time: 3.5 h at 65 °C; water content: 83 wt%.

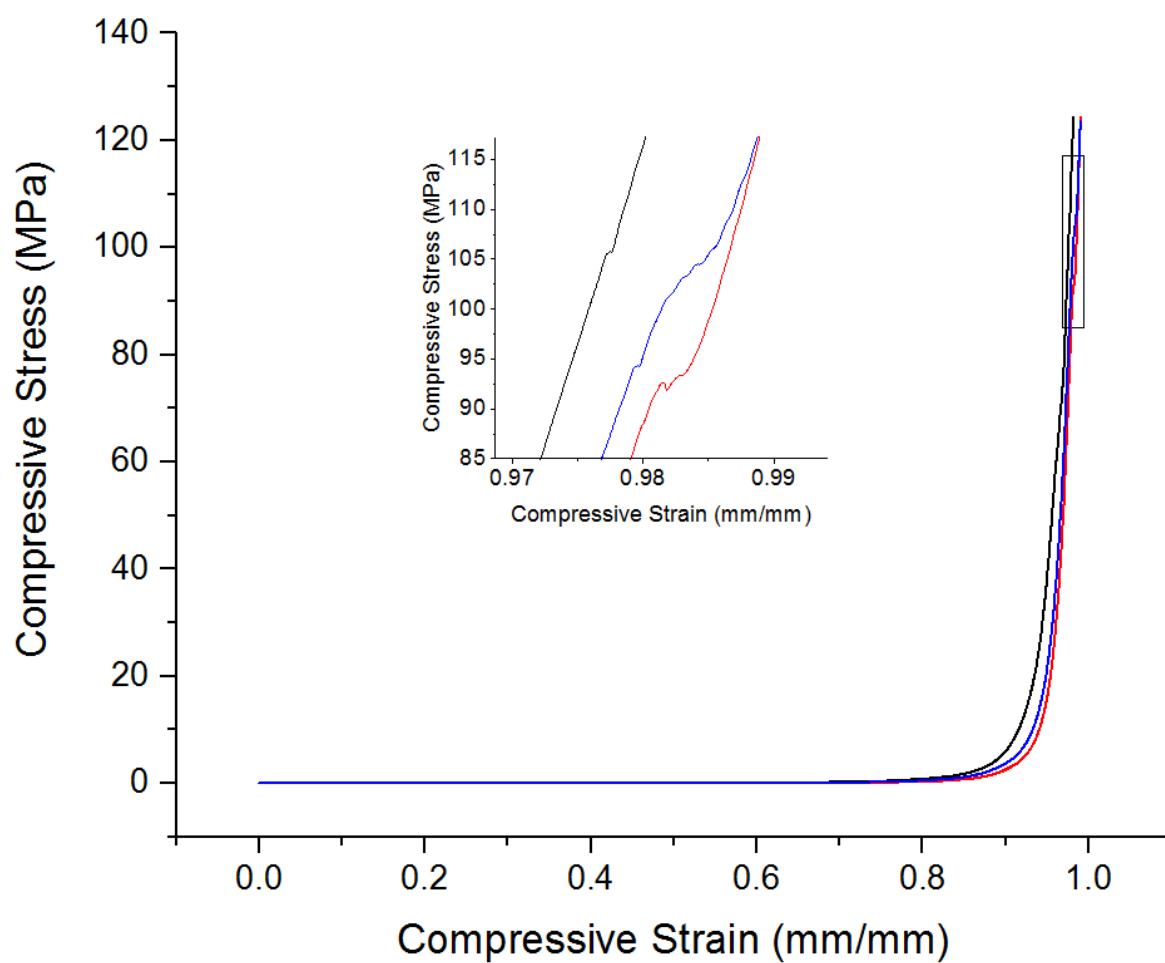

**Figure S11.** Stress–strain curves that were recorded for an ArGO-PAAm DN hydrogel. Conditions: ArGO/AAm = 1 : 9 w/w, 0.1 mol% MBAA relative to AAm and 1 mol% APS relative to AAm, polymerization time: 7 h at 65 °C; water content: 83 wt%.

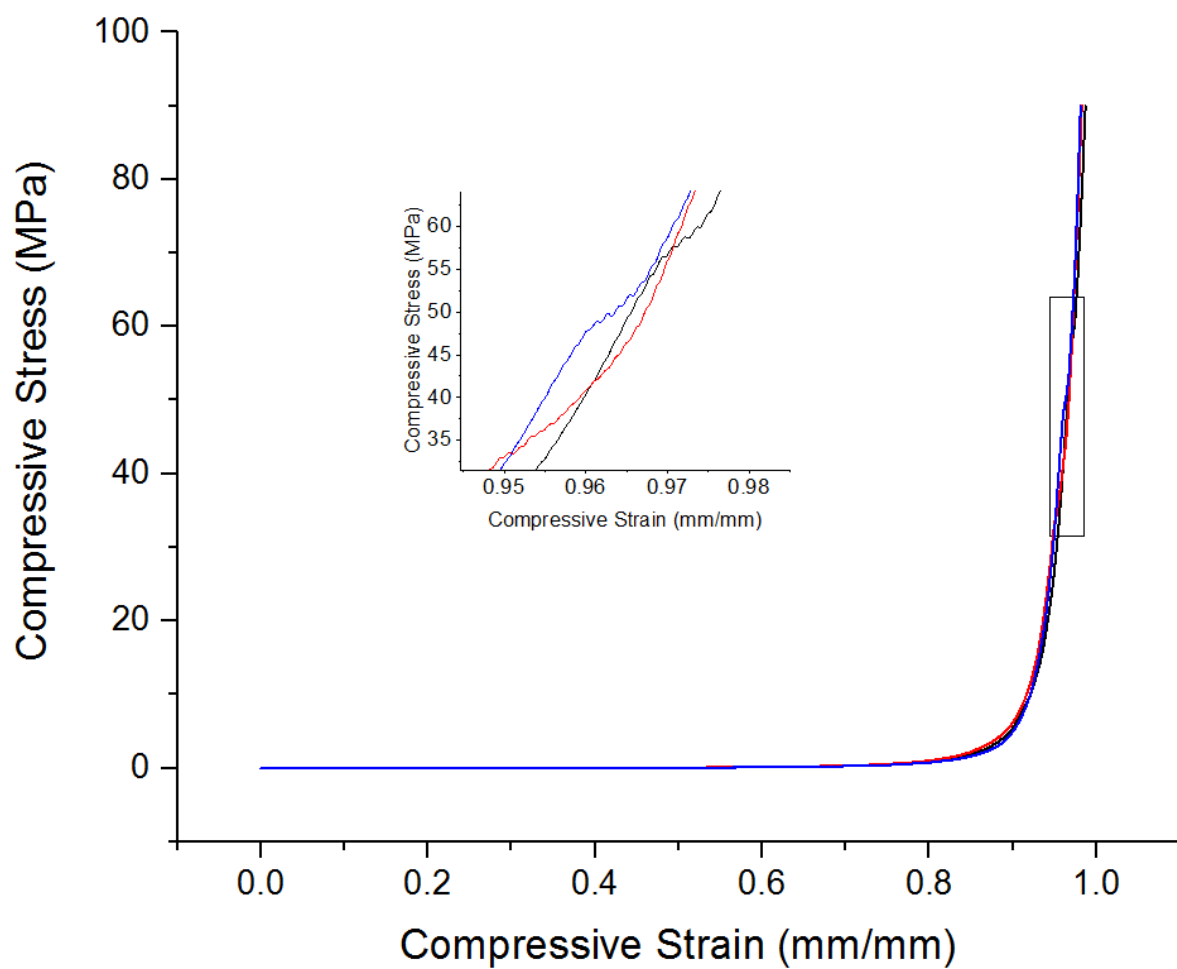

**Figure S12.** Stress–strain curves that were recorded for an ArGO-PAAm DN hydrogel. Conditions: ArGO/AAm = 1 : 9 w/w; 0.1 mol% MBAA relative to AAm and 1 mol% APS relative to AAm; polymerization time: 12 h at 65 °C; water content: 83 wt%.



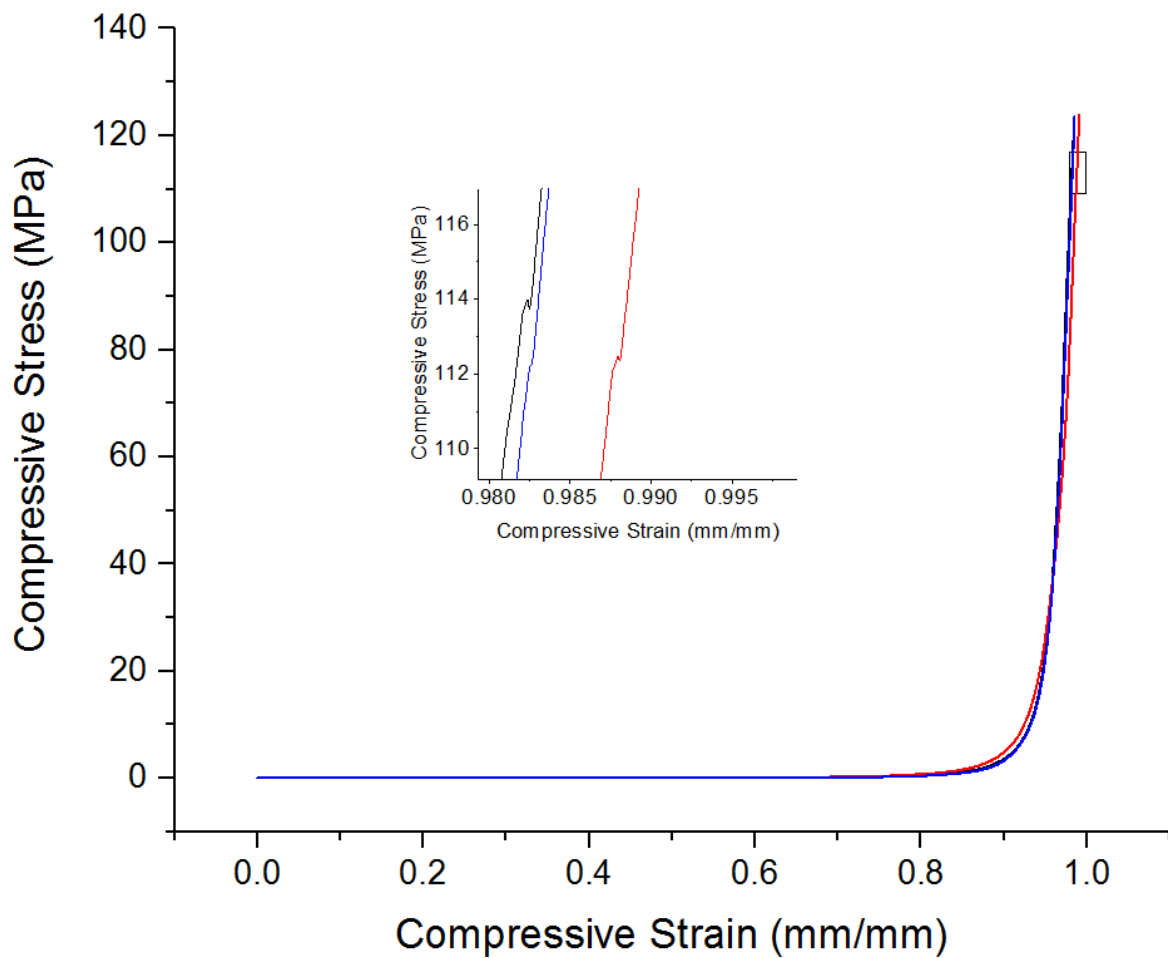

**Figure S13.** Stress–strain curves that were recorded for an ArGO-PAAm DN hydrogel. Conditions: ArGO/AAm = 1 : 9 w/w, 0.06 mol% MBAA relative to AAm and 1 mol% APS relative to AAm, polymerization time: 7 h at 65 °C; water content: 83 wt%.

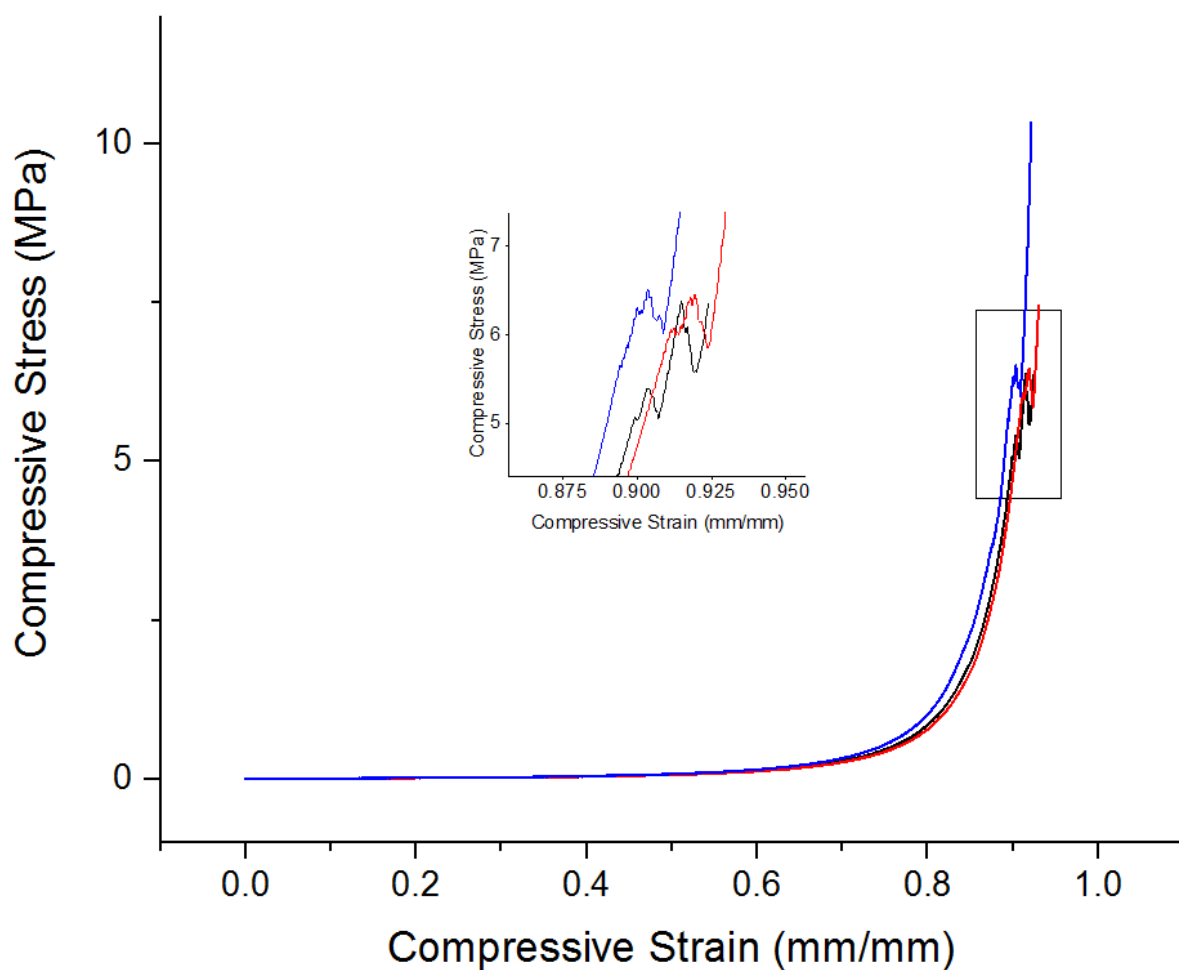

**Figure S14.** Stress–strain curves that were recorded for an ArGO-PAAm DN hydrogel. Conditions: ArGO/AAm = 1 : 9 w/w, 0.025 mol% MBAA relative to AAm and 1 mol% APS relative to AAm, polymerization time: 7 h at 65 °C; water content: 83 wt%.

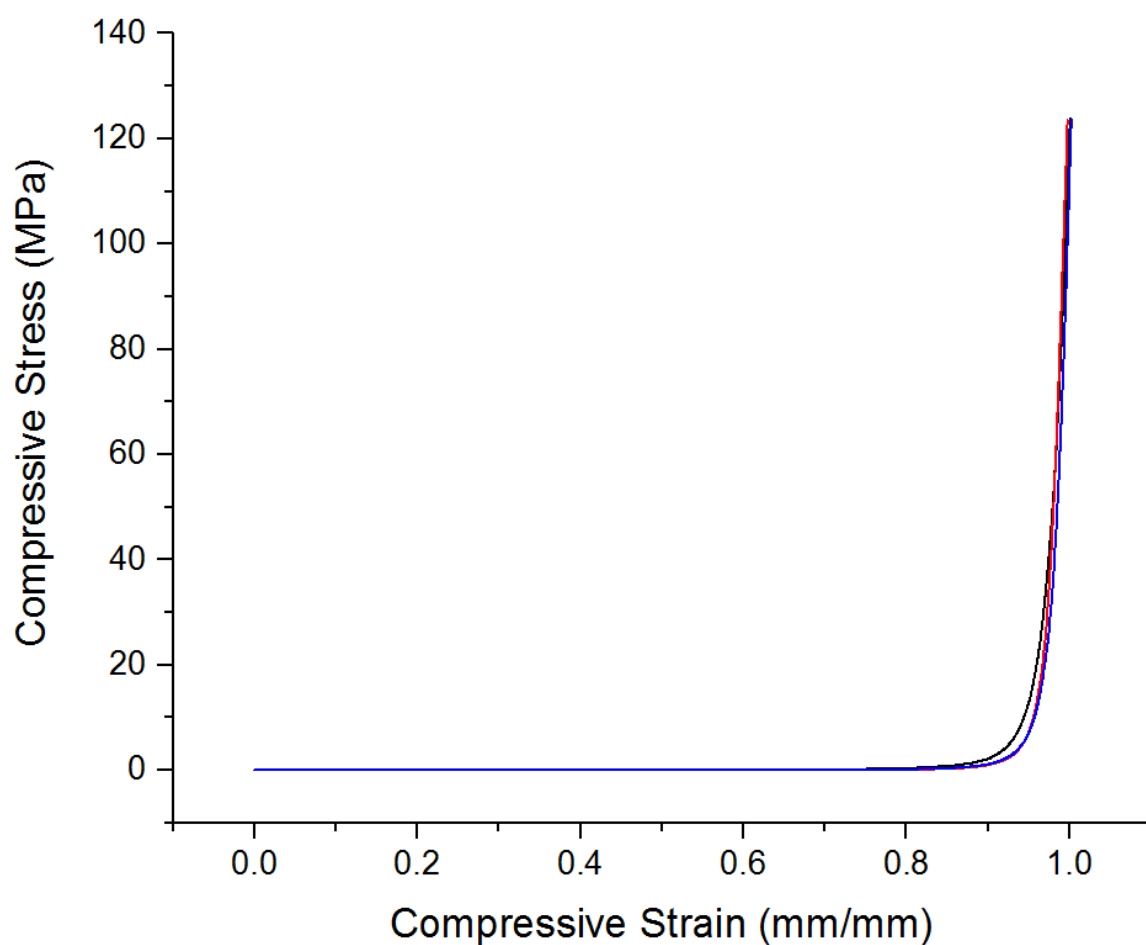

**Figure S15.** Stress–strain curves that were recorded for an ArGO-PAAm DN hydrogel. Conditions: ArGO/AAm = 1 : 5 w/w, 0.1 mol% MBAA relative to AAm and 1 mol% APS relative to AAm, polymerization time: 7 h at 65 °C; water content: 89 wt%.

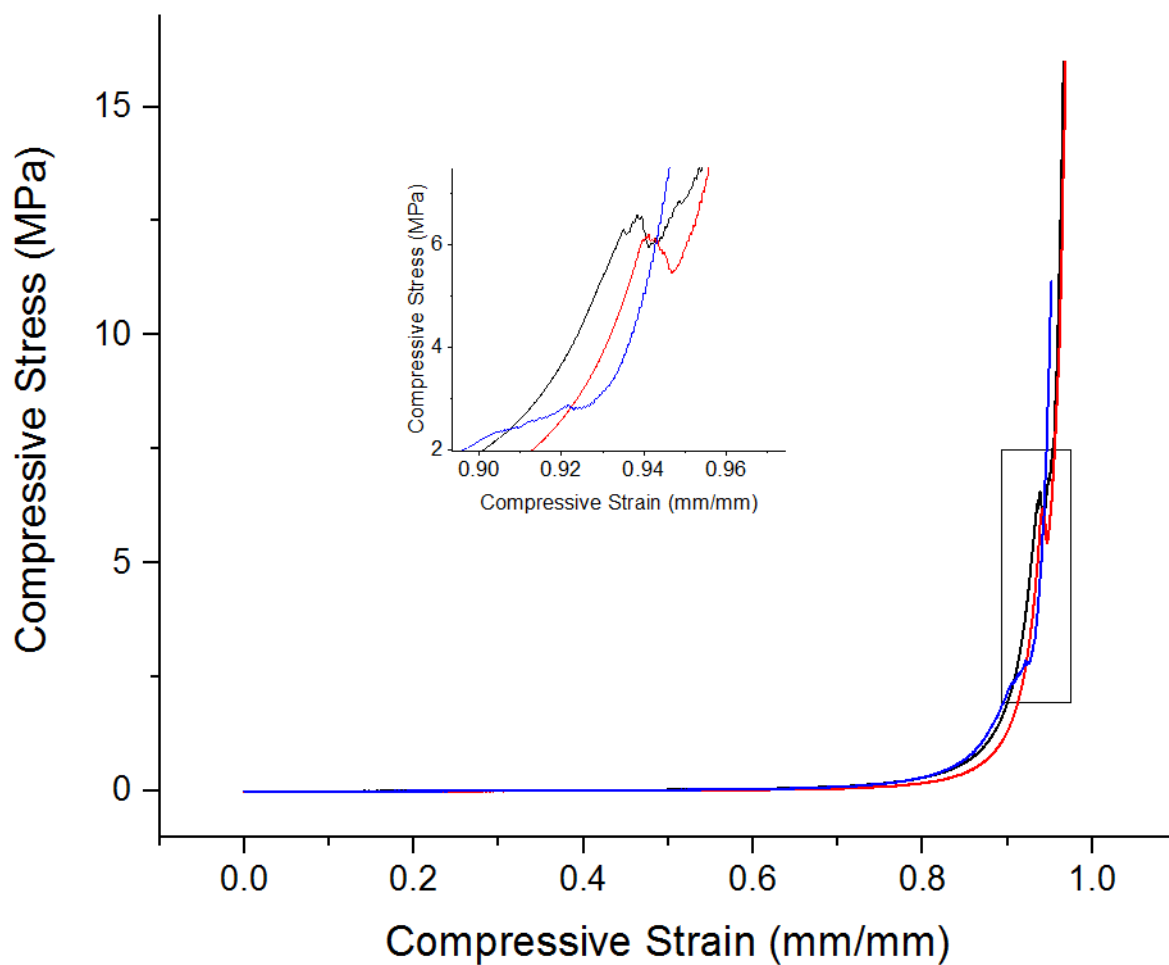

**Figure S16.** Stress–strain curves that were recorded for an PAAm SN hydrogel. Conditions: 0.1 mol% MBAA relative to AAm and 1 mol% APS relative to AAm, polymerization time: 7 h at 65 °C; water content: 83 wt%.

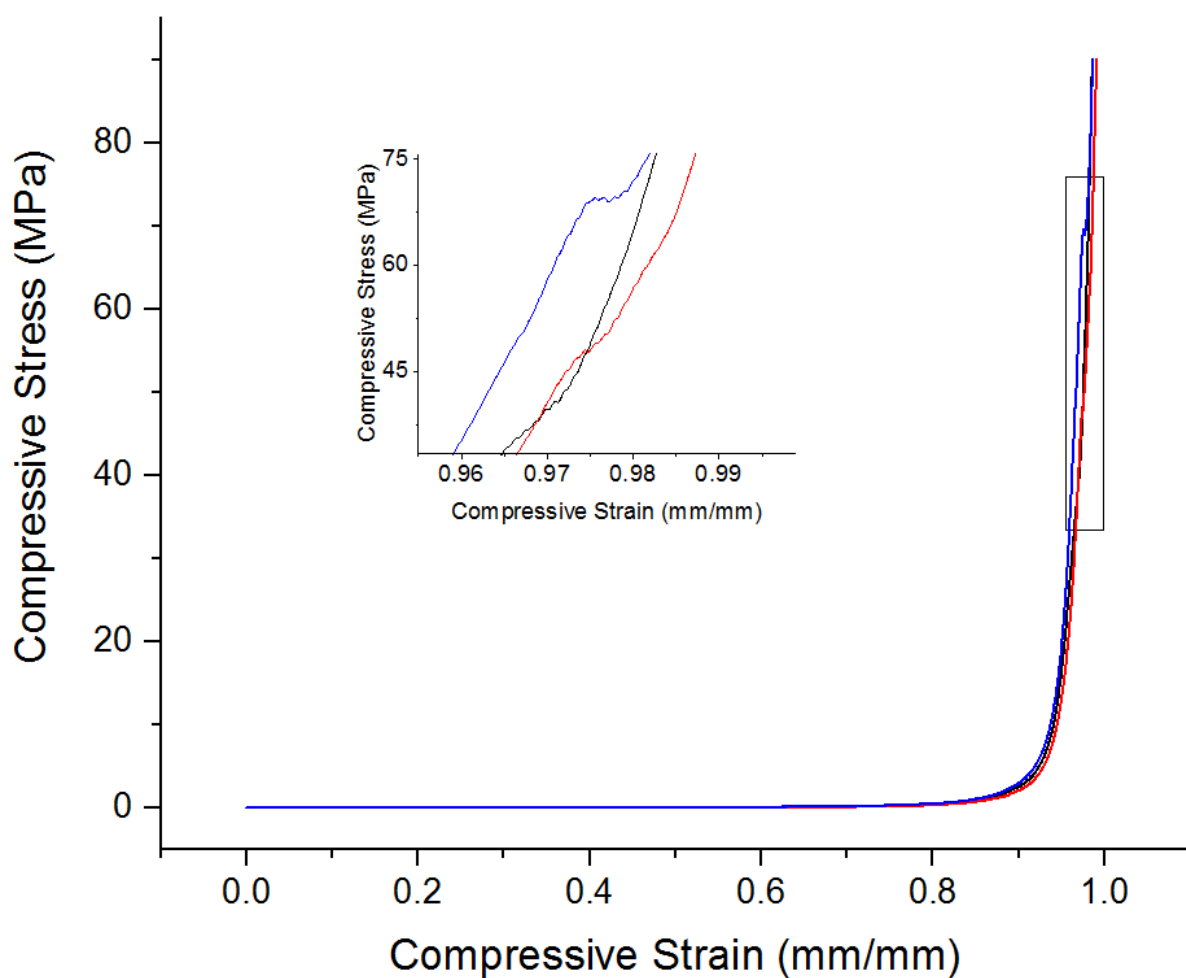

**Figure S17.** Stress–strain curves that were recorded for an Agar-PAAm DN hydrogel. Conditions: Agar/AAm = 1 : 9 w/w, 0.1 mol% MBAA relative to AAm and 1 mol% APS relative to AAm, polymerization time: 7 h at 65 °C; water content: 83 wt%.
